# Supplementary material
Source: PubMed Central journal article supplement (PMC5090706)

## Expanded View Figures

**Figure EV1. Cisplatin sensitivity in cells expressing RING-less BRCA1.**

A Western blot showing the expression of mutant BRCA1 isoform in *BRCA1<sup>Δ2/Δ2</sup>;Trp53bp1<sup>+/+</sup>* B cells.  
 B Chromosome aberrations in *Brca1<sup>Δ2/Δ2</sup>* and *Brca1<sup>Δ11/Δ11</sup>* mouse B cells after overnight exposure to 5 μM cisplatin. *N* = 3, mean frequencies of chromosome-type breaks (CSB), single chromatid breaks (CTD), radial chromosomes, and all other chromosome aberrations (Other) are shown. Error bars show standard deviation of the mean total chromosome aberration frequency for each genotype. *P*-value calculated using Student's *t*-test, two-tailed.

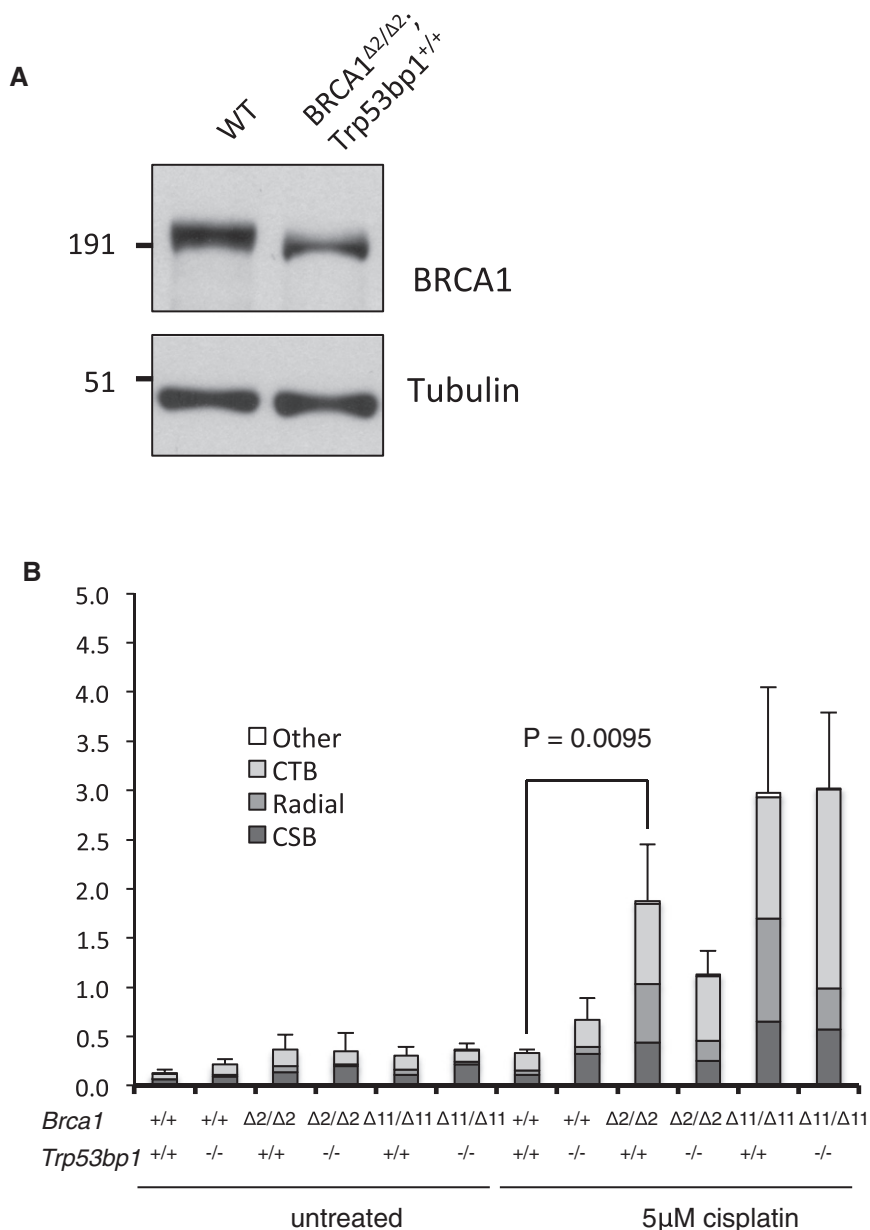

Supplement: EMBR-17-1532-s001.pdf [file EMBR-17-1532-s001.pdf]
